# Supplementary material
Source: HighWire-hosted journal article supplement (https://jitc.bmj.com/content/12/11/e009573)
Supplement: inline-supplementary-material-1 [file inline-supplementary-material-1.pdf]

Table S1. Acceptable ICD10 codes

|                                                                              |                                                                                            |
|------------------------------------------------------------------------------|--------------------------------------------------------------------------------------------|
| C00 Malignant Neoplasm of the Lip                                            | C09.0 Malignant neoplasm of tonsillar fossa                                                |
| C00.0 Malignant neoplasm of external upper lip                               | C09.1 Malignant neoplasm of tonsillar pillar (anterior) (posterior)                        |
| C00.1 Malignant neoplasm of external lower lip                               | C09.8 Malignant neoplasm of overlapping sites of tonsil                                    |
| C00.2 Malignant neoplasm of external lip, unspecified                        | C09.9 Malignant neoplasm of tonsil, unspecified                                            |
| C00.3 Malignant neoplasm of upper lip, inner aspect                          | C10 Malignant Neoplasm of Oropharynx                                                       |
| C00.4 Malignant neoplasm of lower lip, inner aspect                          | C10.0 Malignant neoplasm of vallecula                                                      |
| C00.5 Malignant neoplasm of lip, unspecified, inner aspect                   | C10.1 Malignant neoplasm of anterior surface of epiglottis                                 |
| C00.6 Malignant neoplasm of commissure of lip, unspecified                   | C10.2 Malignant neoplasm of lateral wall of oropharynx                                     |
| C00.8 Malignant neoplasm of overlapping sites of lip                         | C10.3 Malignant neoplasm of posterior wall of oropharynx                                   |
| C00.9 Malignant neoplasm of lip, unspecified                                 | C10.4 Malignant neoplasm of branchial cleft                                                |
| C01 Malignant Neoplasm of Base of Tongue                                     | C10.8 Malignant neoplasm of overlapping sites of oropharynx                                |
| C01 Malignant neoplasm of base of tongue                                     | C10.9 Malignant neoplasm of oropharynx, unspecified                                        |
| C02 Malignant Neoplasm of Other and Unspecified Parts of Tongue              | C12 Malignant neoplasm of pyriform sinus                                                   |
| C02.0 Malignant neoplasm of dorsal surface of tongue                         | C12 Malignant neoplasm of pyriform sinus                                                   |
| C02.1 Malignant neoplasm of border of tongue                                 | C13 Malignant Neoplasm of Hypopharynx                                                      |
| C02.2 Malignant neoplasm of ventral surface of tongue                        | C13.0 Malignant neoplasm of postcricoid region                                             |
| C02.3 Malignant neoplasm of anterior two-thirds of tongue, part unspecified  | C13.1 Malignant neoplasm of aryepiglottic fold, hypopharyngeal aspect                      |
| C02.4 Malignant neoplasm of lingual tonsil                                   | C13.2 Malignant neoplasm of posterior wall of hypopharynx                                  |
| C02.8 Malignant neoplasm of overlapping sites of tongue                      | C13.8 Malignant neoplasm of overlapping sites of hypopharynx                               |
| C02.9 Malignant neoplasm of tongue, unspecified                              | C13.9 Malignant neoplasm of hypopharynx, unspecified                                       |
| C03 Malignant Neoplasm of Gum                                                | C14 Malignant Neoplasm of Other and Ill-Defined Sites in the Lip, Oral Cavity, and Pharynx |
| C03.0 Malignant neoplasm of upper gum                                        | C14.0 Malignant neoplasm of pharynx, unspecified                                           |
| C03.1 Malignant neoplasm of lower gum                                        | C14.2 Malignant neoplasm of Waldeyer's ring                                                |
| C03.9 Malignant neoplasm of gum, unspecified                                 | C14.8 Malignant neoplasm of overlapping sites of lip, oral cavity, and pharynx             |
| C04 Malignant Neoplasm of Floor of Mouth                                     | C30 Malignant Neoplasm of Nasal Cavity and Middle Ear                                      |
| C04.0 Malignant neoplasm of anterior floor of mouth                          | C30.0 Malignant neoplasm of nasal cavity                                                   |
| C04.1 Malignant neoplasm of lateral floor of mouth                           | C30.1 Malignant neoplasm of middle ear                                                     |
| C04.8 Malignant neoplasm of overlapping sites of floor of mouth              | C31 Malignant Neoplasm of Accessory Sinuses                                                |
| C04.9 Malignant neoplasm of floor of mouth, unspecified                      | C31.0 Malignant neoplasm of maxillary sinus                                                |
| C05 Malignant Neoplasm of Palate                                             | C31.1 Malignant neoplasm of ethmoidal sinus                                                |
| C05.0 Malignant neoplasm of hard palate                                      | C31.2 Malignant neoplasm of frontal sinus                                                  |
| C05.1 Malignant neoplasm of soft palate                                      | C31.3 Malignant neoplasm of sphenoid sinus                                                 |
| C05.2 Malignant neoplasm of uvula                                            | C31.8 Malignant neoplasm of overlapping sites of accessory sinuses                         |
| C05.8 Malignant neoplasm of overlapping sites of palate                      | C31.9 Malignant neoplasm of accessory sinus, unspecified                                   |
| C05.9 Malignant neoplasm of palate, unspecified                              | C32 Malignant Neoplasm of Larynx                                                           |
| C06 Malignant Neoplasm of Other and Unspecified Parts of Mouth               | C32.0 Malignant neoplasm of glottis                                                        |
| C06.0 Malignant neoplasm of cheek mucosa                                     | C32.1 Malignant neoplasm of supraglottis                                                   |
| C06.1 Malignant neoplasm of vestibule of mouth                               | C32.2 Malignant neoplasm of subglottis                                                     |
| C06.2 Malignant neoplasm of retromolar area                                  | C32.3 Malignant neoplasm of laryngeal cartilage                                            |
| C06.80 Malignant neoplasm of overlapping sites of unspecified parts of mouth | C32.8 Malignant neoplasm of overlapping sites of larynx                                    |
| C06.89 Malignant neoplasm of overlapping sites of other parts of mouth       | C32.9 Malignant neoplasm of larynx, unspecified                                            |
| C06.9 Malignant neoplasm of mouth, unspecified                               | C76 Malignant Neoplasm of Head, Face, and Neck (other and ill-defined sites)               |
| C09 Malignant Neoplasm of Tonsil                                             | C76.0 Malignant neoplasm of head, face, and neck                                           |

Table S2. HUGO gene designations of input genes for model development

|         |        |         |          |         |          |          |         |
|---------|--------|---------|----------|---------|----------|----------|---------|
| C2      | PTPRC  | HLA-DRA | C1QB     | CD3E    | FCER1G   | C3AR1    | CCL4    |
| DOCK8   | LILRB4 | CCR5    | CCL3L3   | CXCR3   | GZMH     | GPR65    | CD80    |
| STAT2   | DRAM1  | IL21R   | TNFAIP3  | PSMB9   | IL15     | GBP5     | CD300LF |
| RNF19B  | ETV7   | CD96    | CXCL11   | TMEM140 | PLAUR    | ISG20    | IFNG    |
| SLC15A3 | GPR171 | APOL3   | RIPK2    | LILRB2  | SLA2     | ICAM1    | SPI1    |
| IFIT2   | SIRPG  | CCL5    | CD69     | IL15RA  | TRANK1   | CD74     | DOK2    |
| IFI30   | TAP2   | IL2RB   | TRIM21   | HLA-B   | WARS     | GBP2     | STAT4   |
| CXCL10  | PARP14 | CD163   | SP100    | SAMSN1  | PDCD1    | CD2      | CD300A  |
| JAK2    | FPR3   | UHRF2   | NLRC5    | UBA7    | CSF1     | LAG3     | RANBP6  |
| HAPLN3  | SH2D1A | DNAJA1  | ZBP1     | BTN3A1  | IL18BP   | CTSL     |         |
| PLGRKT  | SRGN   | BATF2   | SIGLEC10 | CXCR6   | PDCD1LG2 | CD3G     |         |
| CDC37L1 | UBE2L6 | CD274   | IDO1     | DDX58   | SAMHD1   | GPR84    |         |
| EPSTI1  | TIGIT  | IFIH1   | BTN3A3   | PPP1R18 | ITGAL    | CIITA    |         |
| HLA-F   | FCGR1A | TNFRSF9 | GZMA     | GBP1    | CCL8     | C1QC     |         |
| ITK     | STAT1  | SP110   | TRIM22   | FGL2    | STX11    | TAP1     |         |
| GNLY    | SLAMF8 | GZMB    | HLA-DRB1 | NKG7    | LAP3     | TNFSF13B |         |
| LCP2    | IL2RA  | FCGR3A  | PRF1     | GBP3    | CTLA4    | IRF1     |         |
| HAVCR2  | APOL6  | IFIT3   | IL12RB1  | MYO7A   | CD86     | ICOS     |         |
| FASLG   | GBP4   | TLR8    | CCR1     | STK10   | CXCL9    | PLA2G7   |         |
| RNF213  | CD8A   | FCGR2A  | PTPN22   | B2M     | RIC1     | SAMD9L   |         |

Table S3: Excluded Patient Samples

|                                |            |
|--------------------------------|------------|
| None (included in study)       | 211        |
| Unacceptable Treatment Regimen | 39         |
| Excessive Time to Treatment    | 18         |
| Unacceptable Specimen Site     | 17         |
| Incomplete Data                | 14         |
| Insufficient Material          | 10         |
| Other Ineligible*              | 18         |
| Tumor cellularity              | 48         |
| Fail RNA QC                    | 13         |
| Fail Library QC                | 10         |
| Fail Analytical QC             | 15         |
| Withdrawn                      | 2          |
| <b>Total</b>                   | <b>415</b> |

*Note:*  
\*Includes excluded diagnoses, inconsistent data, site sending wrong material, and other violations of inclusion/exclusion criteria

**Table S4. Inclusion/exclusion criteria**

| Inclusion criteria: |                                                                                                                                                                                                                                                                                                                                                                                 |
|---------------------|---------------------------------------------------------------------------------------------------------------------------------------------------------------------------------------------------------------------------------------------------------------------------------------------------------------------------------------------------------------------------------|
| 1.                  | Subject must have been diagnosed with recurrent or metastatic head and neck squamous cell carcinoma (RM-HNSCC).                                                                                                                                                                                                                                                                 |
| 2.                  | Subject must have received, or been scheduled to receive, at least one dose of anti-PD-1 immunotherapy for treatment of their cancer.                                                                                                                                                                                                                                           |
| 3.                  | Subject must have received, or been scheduled to receive, anti-PD-1 treatment on one of the following regimes: <ul style="list-style-type: none"> <li>A. Pembrolizumab or nivolumab as a single agent (monotherapy)</li> <li>B. Pembrolizumab or nivolumab in combination with platinum chemotherapy, with or without fluorouracil or a taxane (chemo-immunotherapy)</li> </ul> |
| 4.                  | Subject must have had, or will have had, a tumor biopsy prior to treatment with anti-PD-1 immunotherapy (specimen is considered pre-treatment).                                                                                                                                                                                                                                 |
| 5.                  | Clinician must have evaluated, or will have evaluated, tumor response to anti-PD-1 immunotherapy using (1) imaging data performed to assess response to anti-PD-1 treatment and/or (2) clinical assessment. Imaging data must include both (a) pre-anti-PD-1-treatment imaging and (b) imaging performed after the start of anti-PD-1 treatment).                               |
| 6.                  | Subject is willing to provide informed consent per IRB-approved protocol.                                                                                                                                                                                                                                                                                                       |
| 7.                  | Subject must have sufficient tissue available to fulfill the specimen requirements of the study.                                                                                                                                                                                                                                                                                |
| 8.                  | Subject is 18 years of age or older.                                                                                                                                                                                                                                                                                                                                            |
| Exclusion criteria: |                                                                                                                                                                                                                                                                                                                                                                                 |
| 1.                  | Subjects who did not have head and neck squamous cell carcinoma (other histologies).                                                                                                                                                                                                                                                                                            |
| 2.                  | Subjects who only received anti-PD-1 immunotherapy in the newly diagnosed, curative setting.                                                                                                                                                                                                                                                                                    |
| 3.                  | Subjects who received anti-PD-1 immunotherapy in combination with a treatment other than platinum chemotherapy (with or without fluorouracil or a taxane).                                                                                                                                                                                                                      |
| 4.                  | Subjects whose response to anti-PD-1 immunotherapy is not available either as (a) clinician's evaluation of that response or (b) imaging data that was performed to assess response to anti-PD-1 immunotherapy.                                                                                                                                                                 |

**Table S5.** OncoPrism-HNSCC model is not predictive in non-ICI datasets

| dataset   | Number of samples | OncoPrism-HN SCC model |
|-----------|-------------------|------------------------|
| TCGA-HNSC | 500               | 0.32                   |
| GSE65858  | 290               | 0.66                   |
| GSE40774  | 90                | 0.56                   |
| GSE41613  | 97                | 0.71                   |

\*Notes: the p-values represent p-values for log rank test done on a Cox proportional hazards model.

**Table S6.** PD-L1 performance metrics

| Cohort                         | Comparison       | Accuracy | PPV* | NPV* | Sensitivity | Specificity |
|--------------------------------|------------------|----------|------|------|-------------|-------------|
| Cohort 1 (monotherapy)         | CPS<1 vs CPS≥1   | 52%      | 48%  | 75%  | 93%         | 18%         |
| Cohort 1 (monotherapy)         | CPS<20 vs CPS≥20 | 58%      | 55%  | 60%  | 43%         | 71%         |
| Cohort 2 (chemo-immunotherapy) | CPS<1 vs CPS≥1   | 60%      | 61%  | 50%  | 90%         | 15%         |
| Cohort 2 (chemo-immunotherapy) | CPS<20 vs CPS≥20 | 60%      | 76%  | 52%  | 45%         | 81%         |

\*Notes: PPV=positive predictive value; NPV=negative predictive value

Table S7: Comparison of OncoPrism and PD-L1 CPS

|              | PD-L1 TP | PD-L1 FN | PD-L1 TN | PD-L1 FP |
|--------------|----------|----------|----------|----------|
| OncoPrism TP | 33       | 1        | -        | -        |
| OncoPrism FN | 21       | 3        | -        | -        |
| OncoPrism TN | -        | -        | 8        | 32       |
| OncoPrism FP | -        | -        | 1        | 13       |

Abbreviations:

TP, True Positive, correctly predicted disease control;  
FN, False Negative, disease control incorrectly predicted as no disease control;  
TN, True Negative, correctly predicted no disease control;  
FP, False Positive, no disease control incorrectly predicted as disease control

Table S8: Comparison of OncoPrism and TMB

|              | TMB TP | TMB FN | TMB TN | TMB FP |
|--------------|--------|--------|--------|--------|
| OncoPrism TP | 2      | 9      | -      | -      |
| OncoPrism FN | 1      | 1      | -      | -      |
| OncoPrism TN | -      | -      | 10     | 0      |
| OncoPrism FP | -      | -      | 9      | 0      |

*Abbreviations:*  
TP, True Positive, correctly predicted disease control;  
FN, False Negative, disease control incorrectly predicted as no disease control;  
TN, True Negative, correctly predicted no disease control;  
FP, False Positive, no disease control incorrectly predicted as disease control



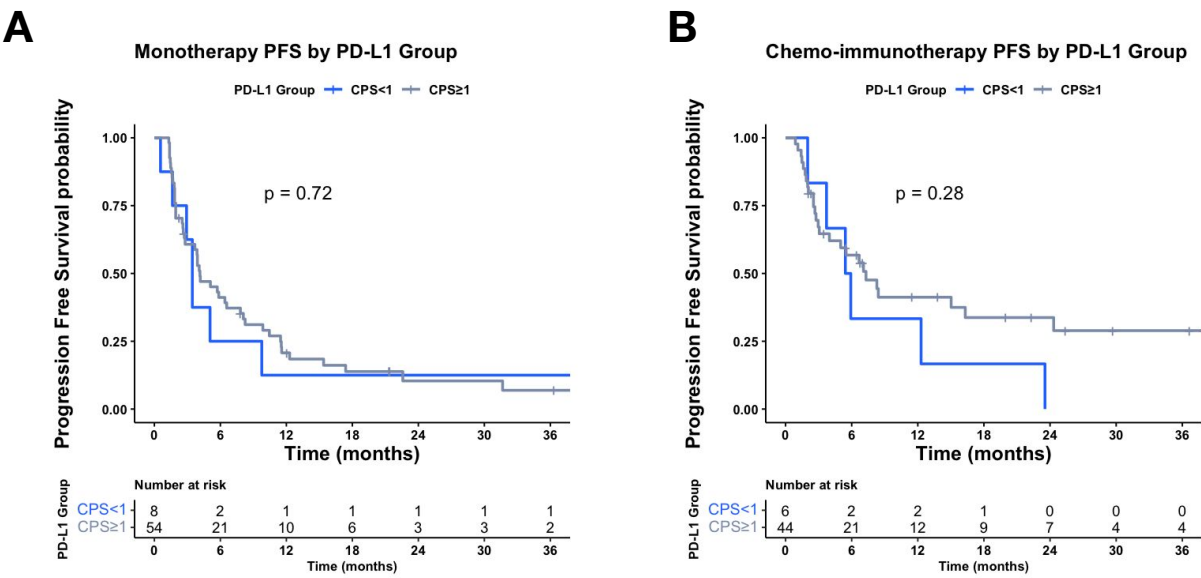

**Figure S1.** PD-L1 does not predict progression-free survival (PFS). Patients were divided into PD-L1 CPS<1 or CPS≥1 groups within each validation cohort. PD-L1 status was not significantly correlated with PFS in the monotherapy ( $p=0.71$ ) **(A)** or chemo-immunotherapy ( $p=0.28$ ) **(B)** validation cohorts. P-values for PFS were calculated using log rank methods.

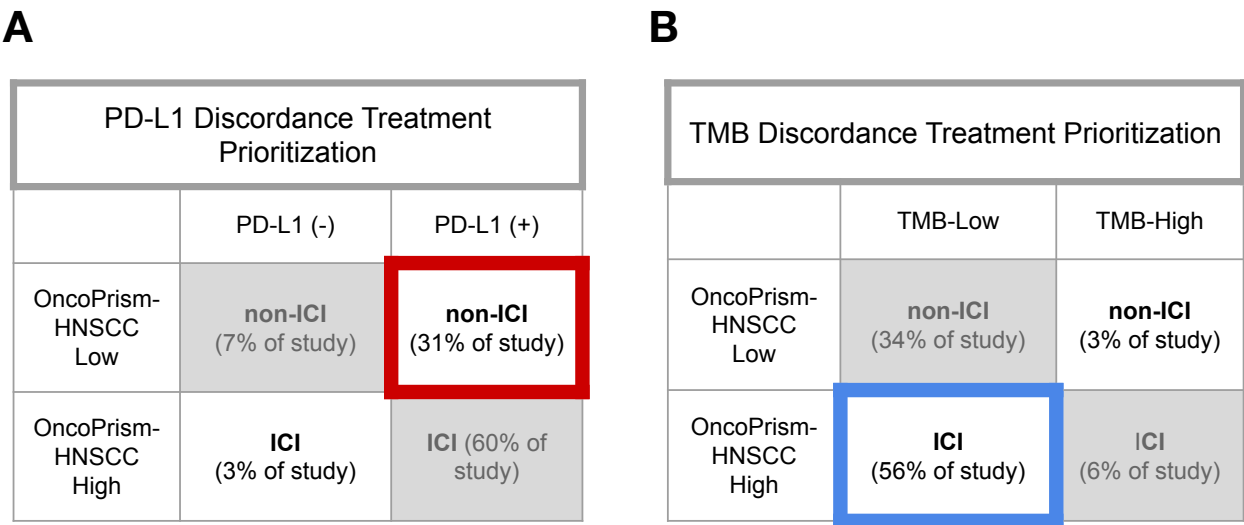

**Figure S2.** Treatment prioritization for discordant test results. The recommended treatment for concordant (grey) and discordant (white) test results is shown for OncoPrism-HNSCC compared to PD-L1 CPS (**A**) or TMB (**B**). The percent shown is the percentage of the study population in each category. The most common discordant test results are outlined for PD-L1 (red) and TMB (blue). OncoPrism Medium samples were considered indeterminate and are not included. For comparison with PD-L1, n=75. For comparison with TMB, n=32.

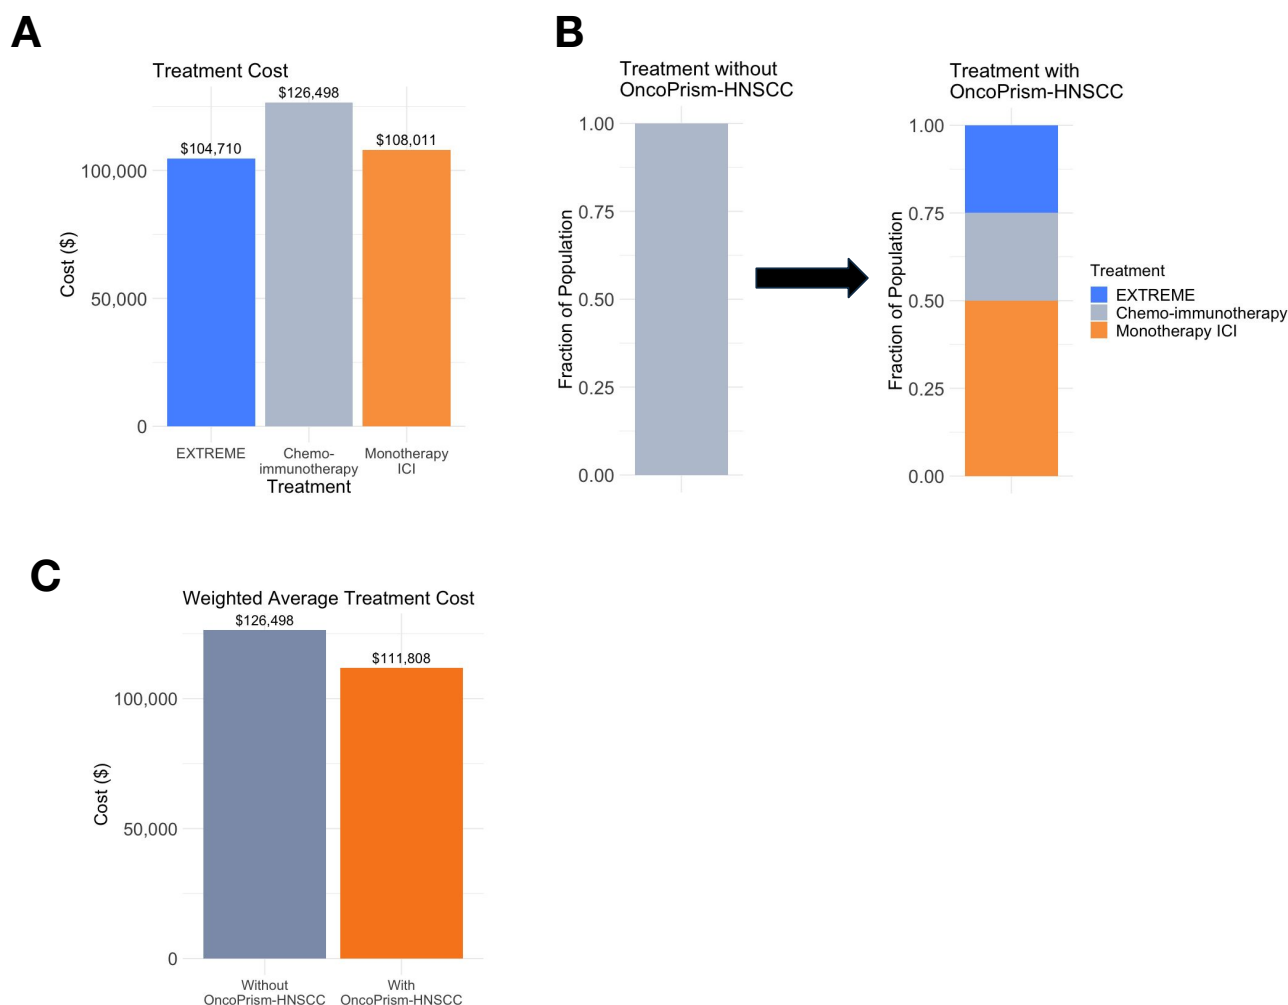

**Figure S3.** The health economics of OncoPrism-HNSCC testing were modeled using **(A)** published costs for three RM-HNSCC treatment options (EXTREME, chemo-immunotherapy, and monotherapy ICI; Lang et al., 2020). **(B)** The modeling assumed a default treatment plan of chemo-immunotherapy for 100% of patients in the absence of OncoPrism-HNSCC testing (left). With OncoPrism-HNSCC testing (right), the model assumed a treatment distribution of 25% EXTREME, 25% chemo-immunotherapy, and 50% monotherapy ICI, based on the expected proportions of patients in the OncoPrism Low, Medium, and High Groups, respectively. **(C)** The weighted average cost per patient was calculated by multiplying the assumed treatment proportions by the cost of each treatment, resulting in an average savings of \$14,691 per OncoPrism-HNSCC tested patient.
